# Supplementary material
Source: Springer Nature journal article supplement (https://www.springermedizin.de/resource/supplementary/12889_2012_4350_MOESM4_ESM.pdf/9491818)

### Severe violence

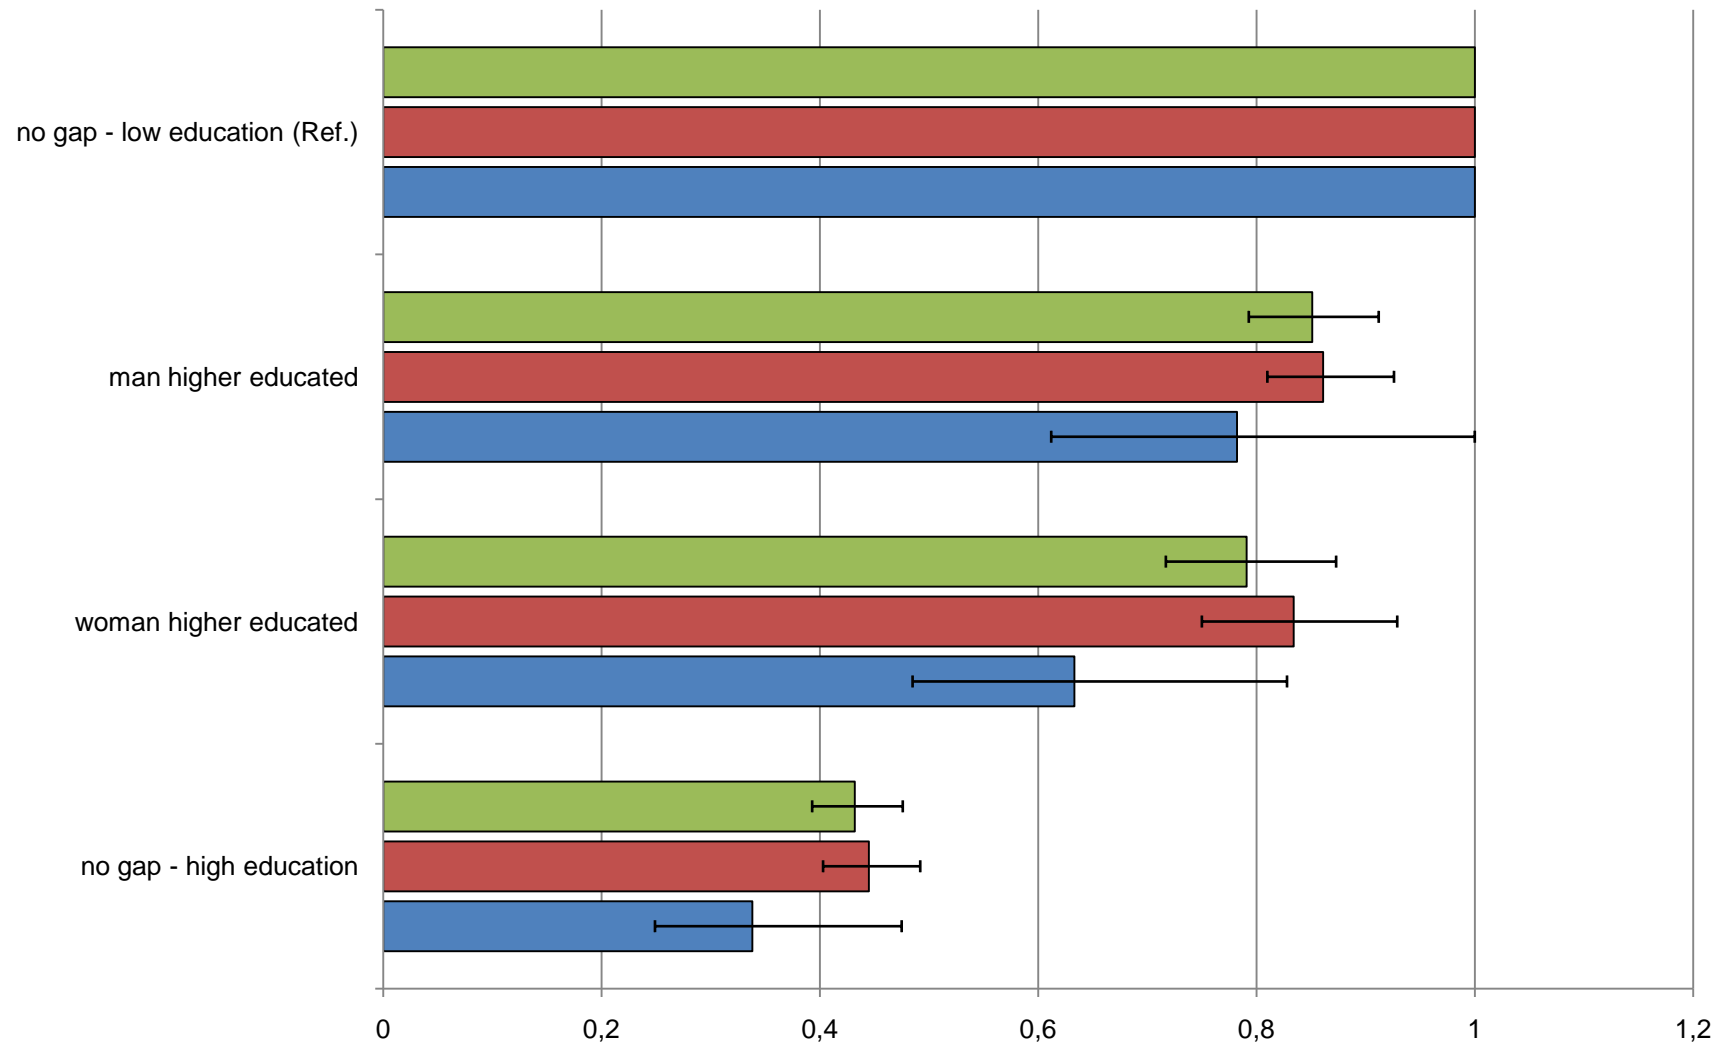

Supplement: MOESM4 [file 9491818]
